# Supplementary material for: The LC3B FRET biosensor monitors the modes of action of ATG4B during autophagy in living cells
Source: bioRxiv or medRxiv preprint supplement (doi:10.1101/2022.05.06.490917), 2022-10-25
Supplement: Supplementary file [file media-1.pdf]

**The LC3B FRET biosensor monitors the modes of action of  
ATG4B during autophagy in living cells**

Elif Begüm Gökerküçük et al.

**Supplementary information**

# Figure S1

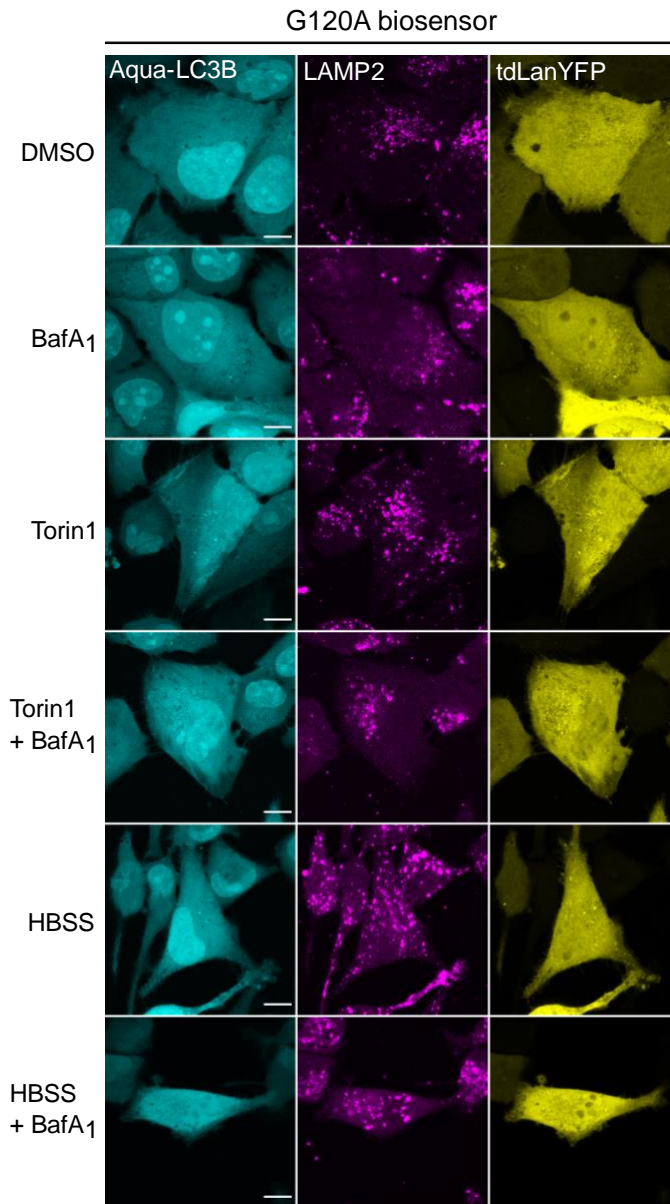

**Figure S1. The G120A LC3B biosensor is not sensitive to autophagy induction and/or lysosomal inhibition, and it does not colocalize with LAMP2.** Representative fluorescence images of U2OS expressing the G120A biosensor and stained for endogenous LAMP2. To investigate the changes in Aqua-LC3B puncta numbers and their colocalization with LAMP2, cells were treated with: DMSO (6h), BafA1 (6h, 100 nM), Torin1 (3h, 250 nM), Torin1 (3h, 250 nM) + BafA1 (6h, 100 nM), HBSS (1h), HBSS (1h) + BafA1 (6h, 100 nM). Scale bar: 9  $\mu$ m.

Figure S2

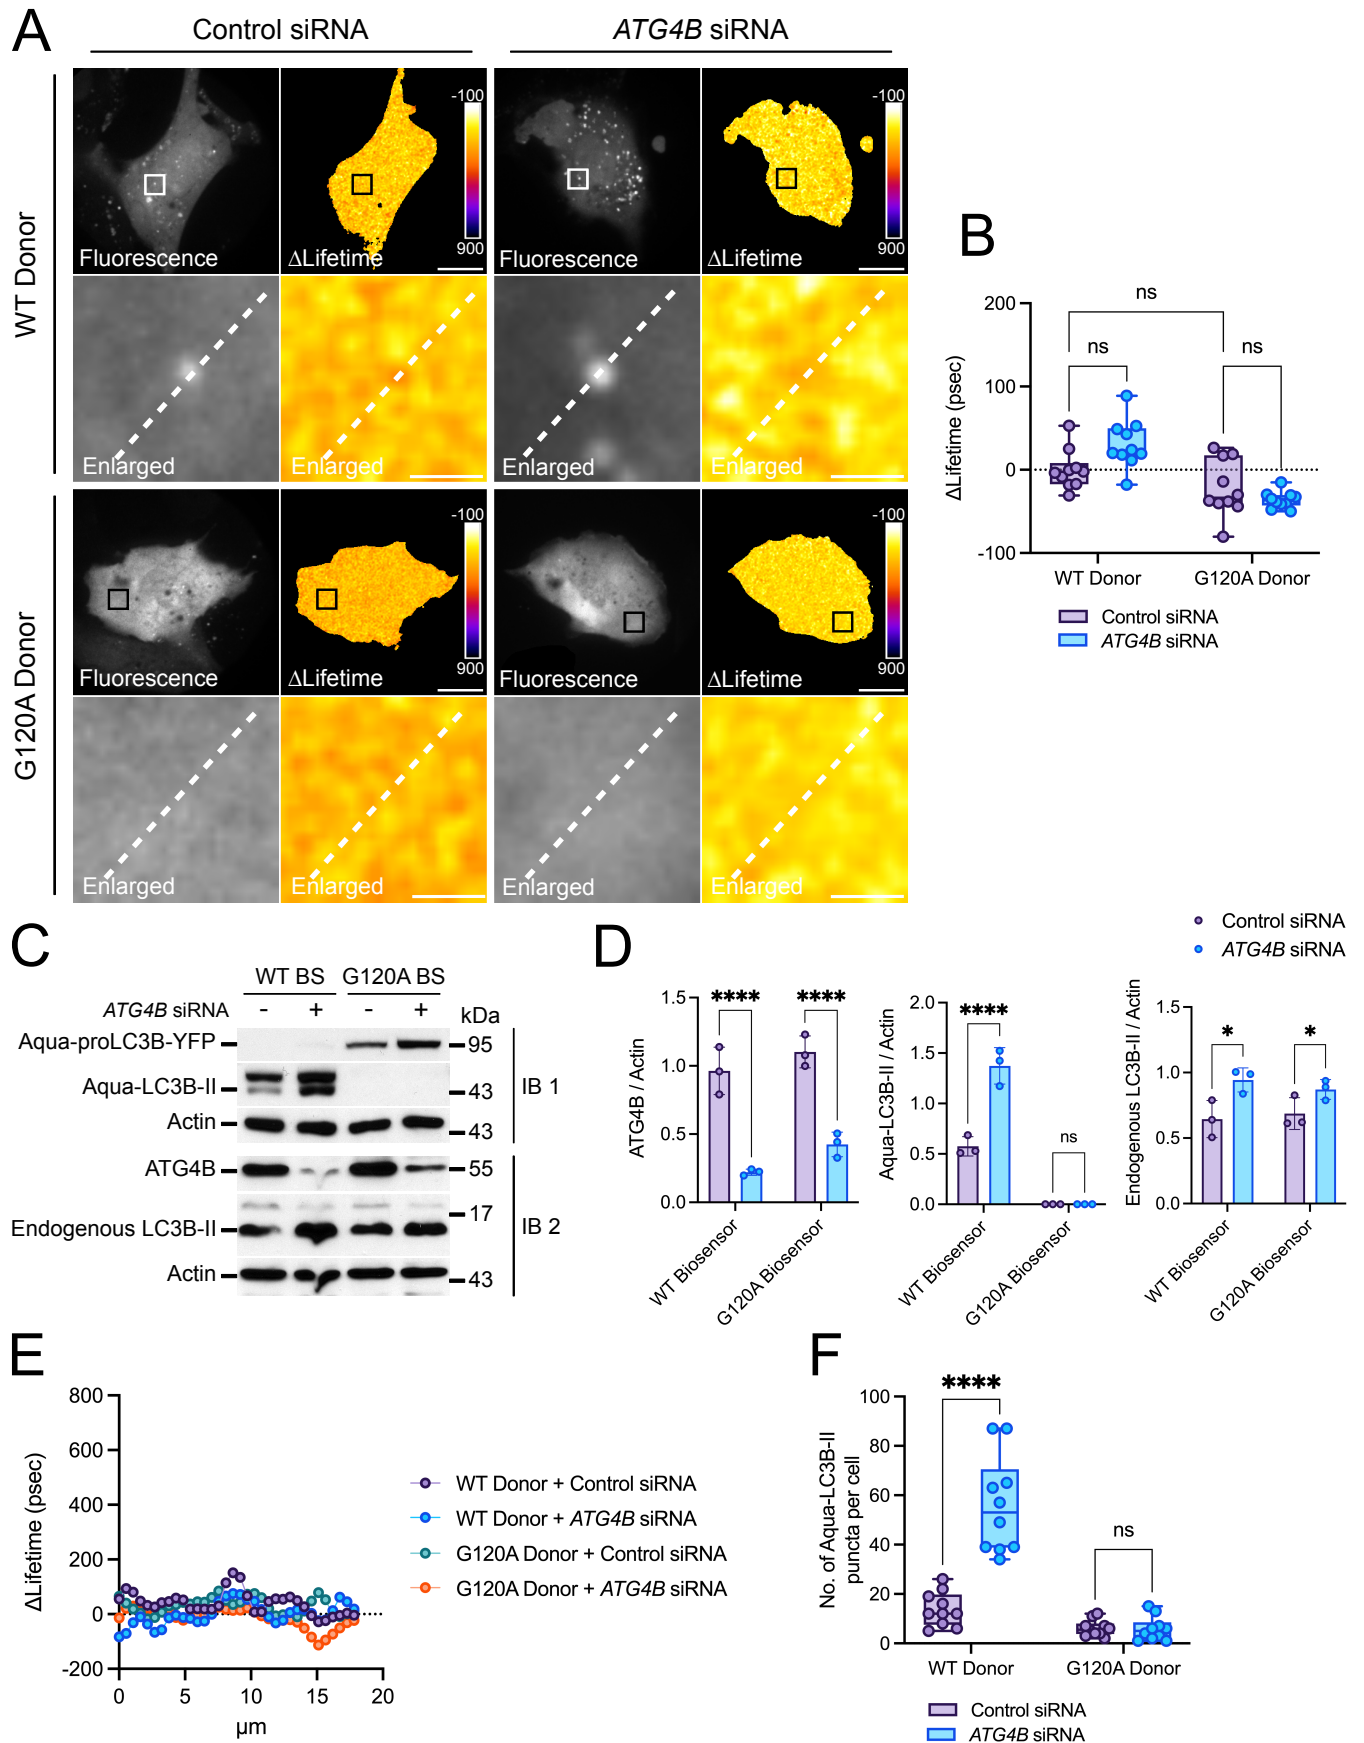

**Figure S2. The WT or G120A donors do not respond to *ATG4B* silencing.** (A) Representative fluorescence and  $\Delta$ Lifetime images of U2OS cells co-expressing the WT or G120A donor with control or *ATG4B*-specific siRNAs, and analyzed by FRET/FLIM. Squares on the top images of WT or G120A donor panels illustrate the location of the enlarged images. Dotted lines on the enlarged images illustrate where the line analysis was performed. Pseudocolor scale: pixel-by-pixel  $\Delta$ Lifetime. Scale bars: overviews, 40  $\mu$ m; enlarged, 6  $\mu$ m. (B) Mean  $\Delta$ Lifetime analysis of U2OS cells co-expressing the WT or G120A donor with control or *ATG4B* siRNA. Representative western blotting images (C) and corresponding quantifications (D) of total lysates from U2OS cells co-expressing the WT or G120A biosensor with control or *ATG4B*-specific siRNAs. IB1 and IB2 correspond to the same lysates blotted for overexpressed (IB1) or endogenous (IB2) LC3B forms. Loading control: Actin.  $n = 3$  independent experiments. (E) Line and (F) number of Aqua-LC3B-II puncta analyses of U2OS cells co-expressing the WT or G120A donor with control or *ATG4B* siRNA.  $n = 10$  cells per condition from one representative experiment (of three) in (B) and (F). \* $P < 0.05$ , \*\*\*\* $P < 0.0001$ , ns (not significant) as determined by two-way ANOVA with Tukey's multiple comparison test in (B) and (F), and with two-stage step-up method of Benjamini, Krieger and Yekutieli's multiple comparison test to control the false discovery rate in (D).

## Figure S3

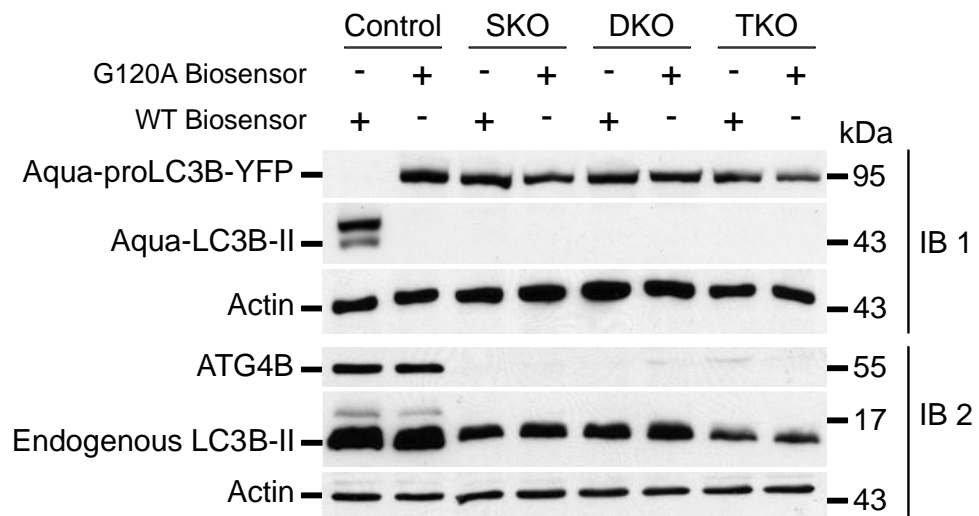

**Figure S3. The LC3B biosensor and endogenous LC3B proteins cannot be primed in cells lacking ATG4B.**

Representative western blotting images of total lysates from HeLa control, *ATG4B* SKO, *ATG4A/B* DKO, *ATG4A/B/C* TKO cells expressing the WT or G120A biosensor. IB1 and IB2 correspond to the same lysates blotted for overexpressed (IB1) or endogenous (IB2) LC3B forms. Loading control: Actin.  $n = 3$  independent experiments.

# Figure S4

## A

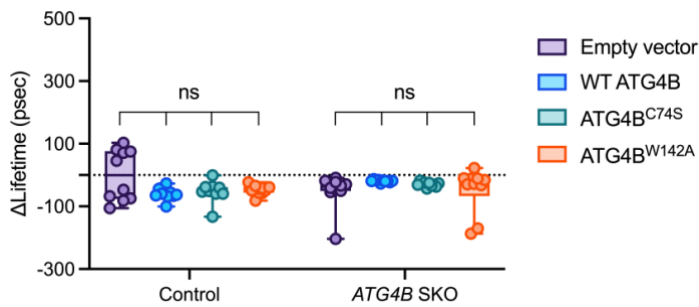

## B

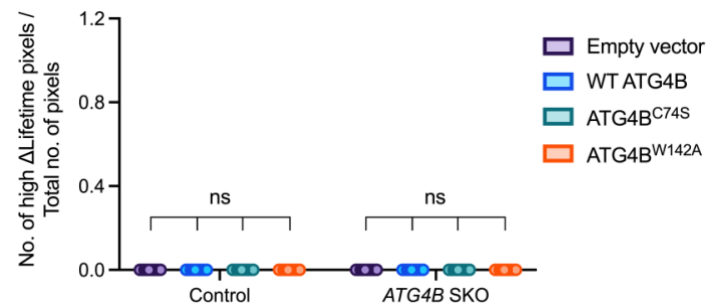

## C

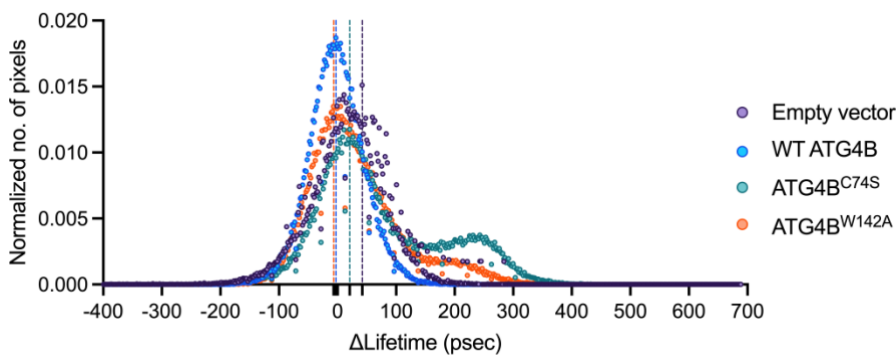

**Figure S4. The ectopic expression of active ATG4B does not alter LC3B donor-only  $\Delta$ lifetime variations in ATG4B SKO cells.** Mean  $\Delta$ Lifetime (**A**) and number of high  $\Delta$ Lifetime pixels (**B**) analyses of control and ATG4B SKO HeLa cells co-expressing the WT donor with an empty vector, or with vectors expressing WT ATG4B, ATG4B<sup>C74S</sup> or ATG4B<sup>W142A</sup>. (**C**) Histogram analysis of HeLa control cells co-expressing the WT biosensor with an empty vector, or with vectors expressing WT ATG4B, ATG4B<sup>C74S</sup> or ATG4B<sup>W142A</sup>. Vertical dotted lines on each histogram depict the mode value.  $n = 10$  cells per condition from one representative experiment (of three) in (**A**), (**B**) and (**C**). ns (not significant) as determined by two-way ANOVA with Tukey's multiple comparison test in (**A**) and (**B**).

Figure S5

A

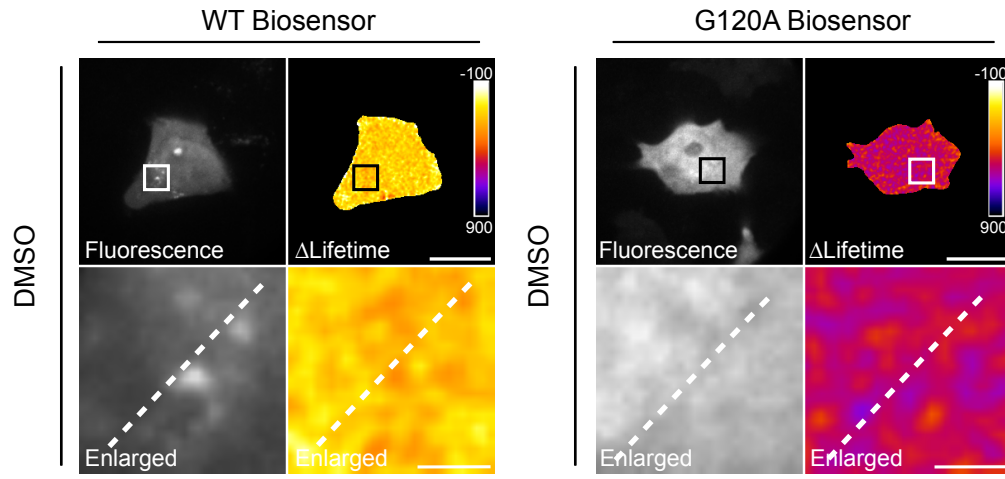

B

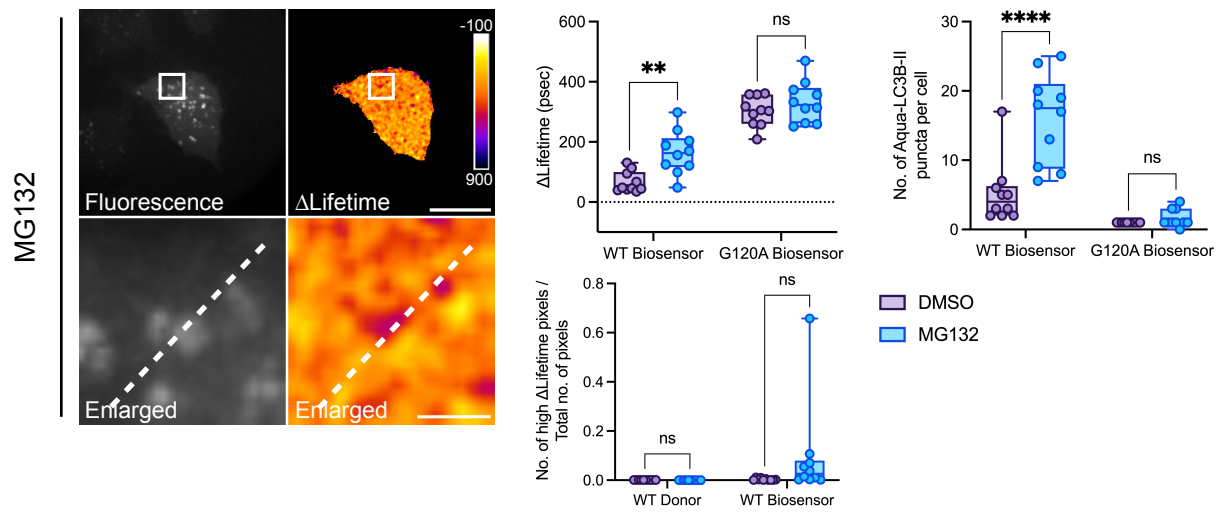

C

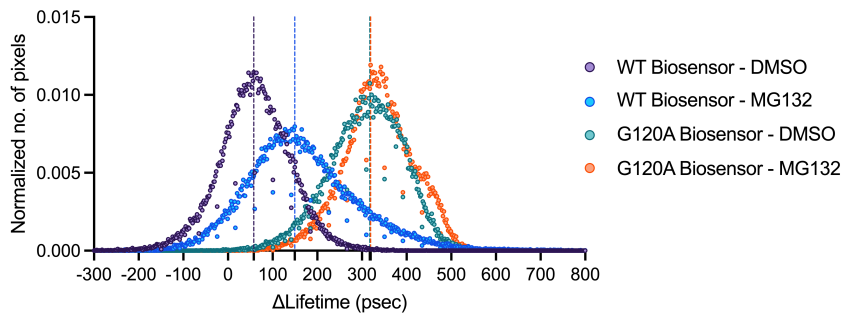

D

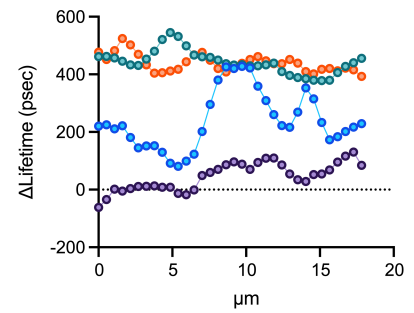

**Figure S5. The LC3B biosensor reveals the mode of action of MG132 in cells.** (A and B) Representative fluorescence and  $\Delta$ Lifetime images of HeLa cells expressing the WT or G120A biosensor, treated with DMSO (6h) or MG132 (6h, 1  $\mu$ M), and analyzed by FRET/FLIM. Pseudocolor scale: pixel-by-pixel  $\Delta$ Lifetime. Scale bars: overviews, 40  $\mu$ m; enlarged, 6  $\mu$ m. Mean  $\Delta$ Lifetime (B), number of Aqua-LC3B-II puncta (B), histogram (C), and line (D) analyses of HeLa cells expressing the WT or G120A biosensor and treated with DMSO (6h) or MG132 (6h, 1  $\mu$ M). Number of high  $\Delta$ Lifetime pixels analysis (B) of HeLa cells expressing the WT donor or biosensor and treated with DMSO (6h) or MG132 (6h, 1  $\mu$ M). Vertical dotted lines on each histogram depict the mode value in (C).  $n = 10$  cells per condition from one representative experiment (of three) in (B) and (C).  $**P < 0.01$ ,  $****P < 0.0001$ , ns (not significant) as determined by two-way ANOVA with Tukey's multiple comparison test in (B).



## Figure S6

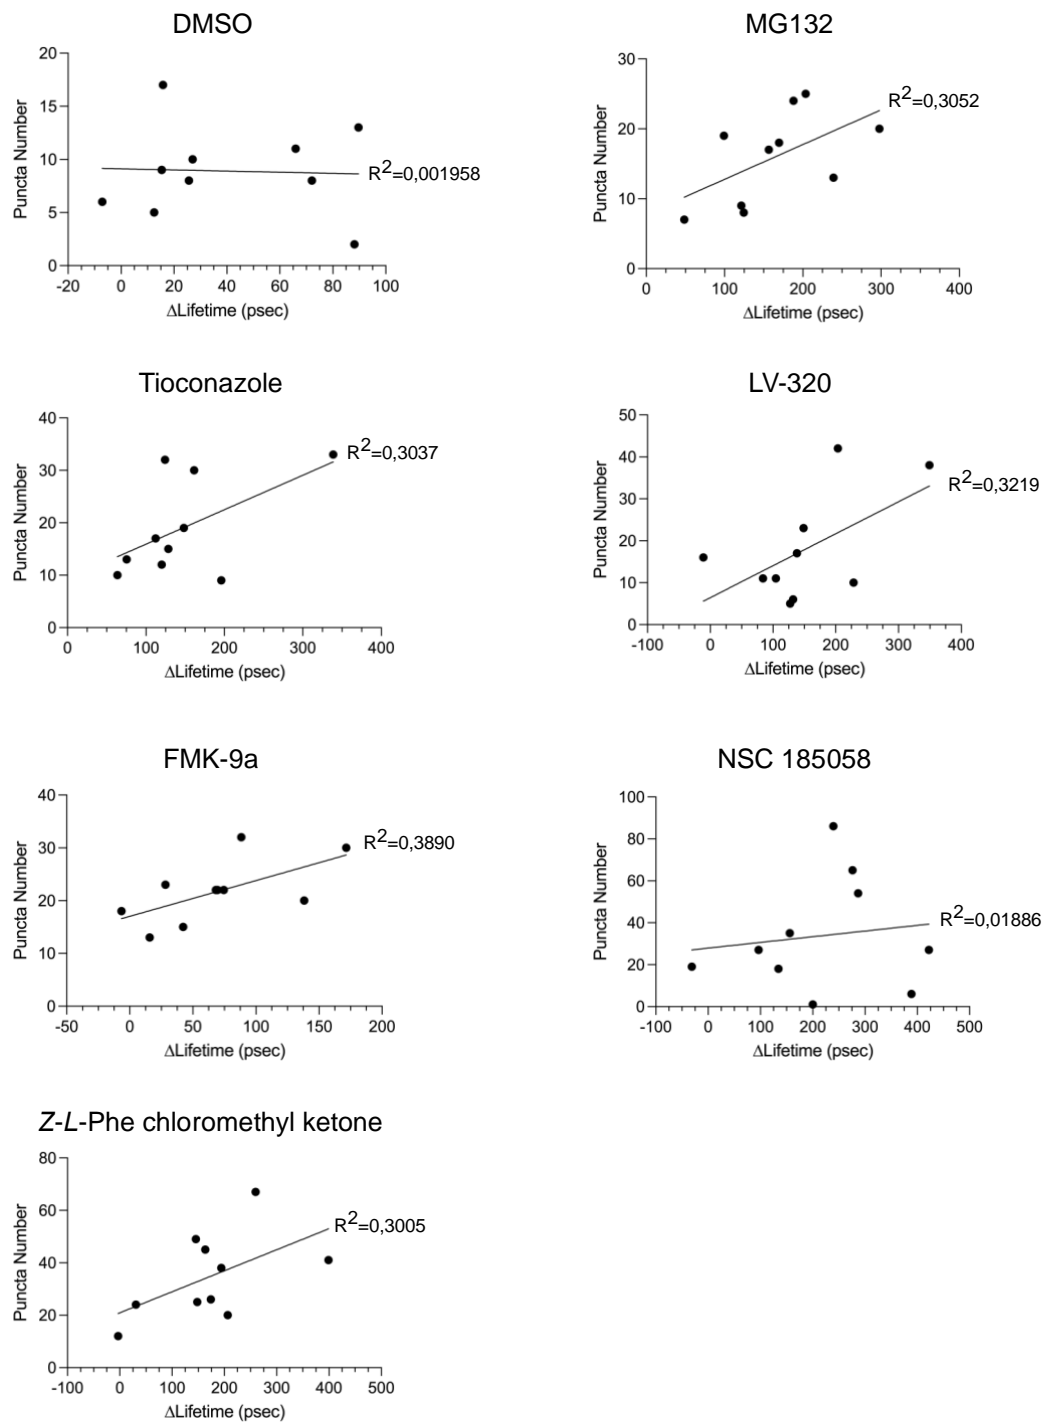

**Figure S6.** The number of Aqua-LC3B-II puncta and the mean  $\Delta$ Lifetime values do not correlate. Correlation analyses of Aqua-LC3B-II puncta and the mean  $\Delta$ Lifetime values of HeLa cells expressing the WT biosensor and treated with DMSO (6h), MG132 (6h, 1  $\mu$ M), Tioconazole (6h, 4  $\mu$ M), LV-320 (6h, 120  $\mu$ M), FMK-9a (6h, 10  $\mu$ M), NSC 185058 (6h, 100  $\mu$ M), or Z-L-Phe chloromethyl ketone (6h, 3  $\mu$ M).  $n = 10$  cells per condition from one representative experiment (of three).

Figure S7

A

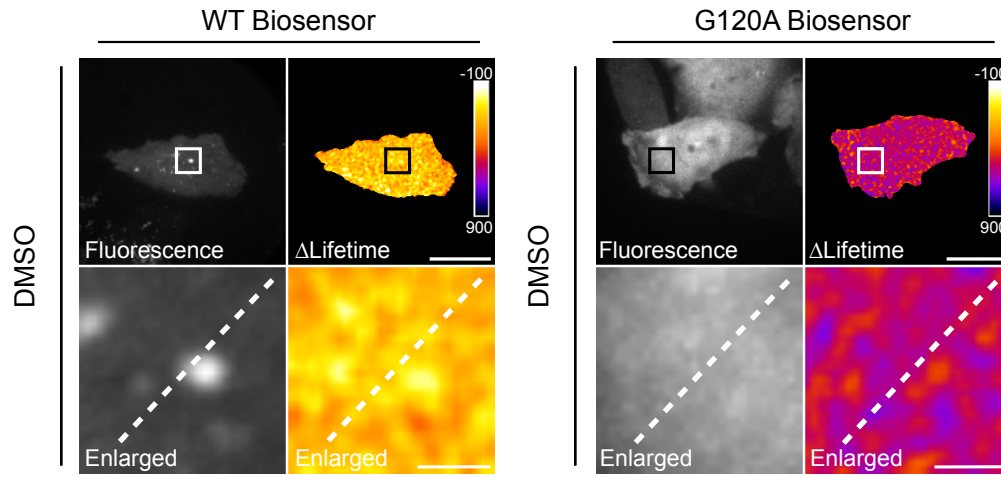

B

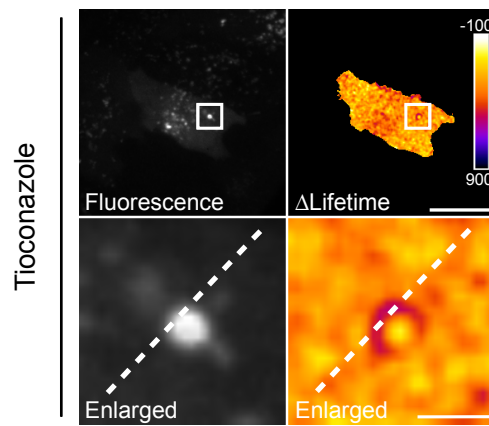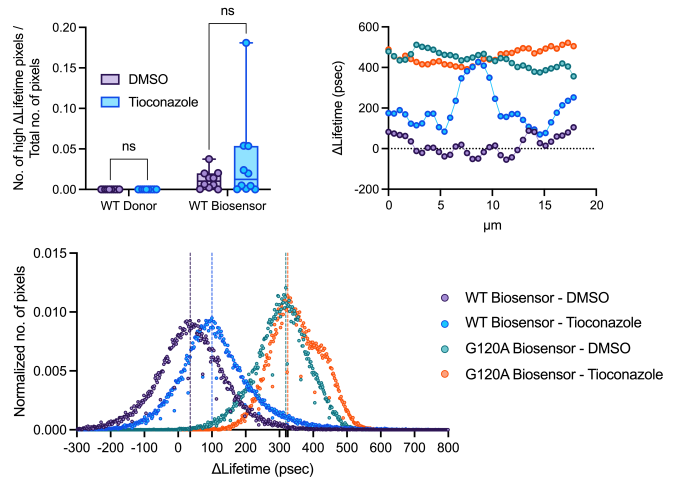

C

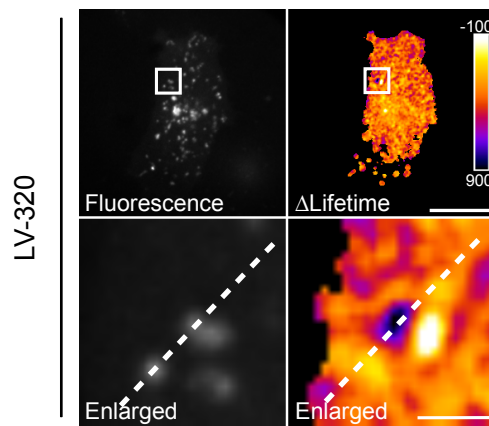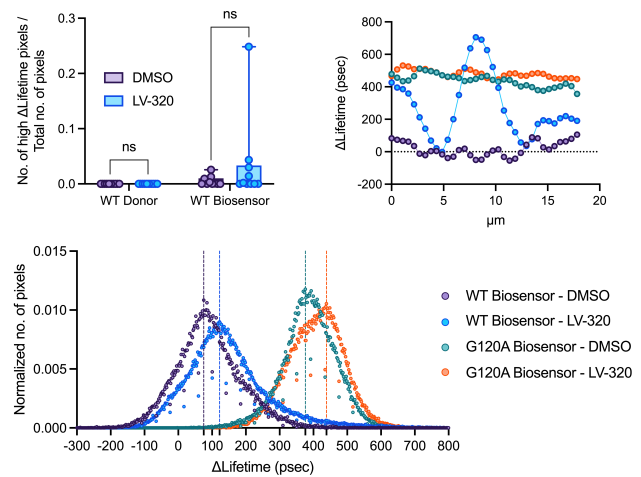

**Figure S7. FRET/FLIM data analyzed by using sensitive methods reveal the mode of action of Tioconazole and LV-320 in cells.** (A) Representative fluorescence and  $\Delta$ Lifetime images of HeLa cells expressing the WT or G120A biosensor, treated with DMSO (6h), and analyzed by FRET/FLIM. Representative fluorescence and  $\Delta$ Lifetime images of HeLa cells expressing the WT biosensor and treated with the following compounds: Tioconazole (6h, 4  $\mu$ M) (B), LV-320 (6h, 120  $\mu$ M) (C). Squares on the top images of WT or G120A biosensor panels illustrate the location of the enlarged images. Dotted lines on the enlarged images illustrate where the line analysis was performed. Pseudocolor scale: pixel-by-pixel  $\Delta$ Lifetime. Scale bars: overviews, 40  $\mu$ m; enlarged, 6  $\mu$ m. Number of high  $\Delta$ Lifetime pixels analysis of HeLa cells expressing the WT donor or biosensor and treated with Tioconazole (6h, 4  $\mu$ M) (B) or LV-320 (6h, 120  $\mu$ M) (C). Line, and histogram analyses of HeLa cells expressing the WT or G120A biosensor and treated with Tioconazole (6h, 4  $\mu$ M) (B) or LV-320 (6h, 120  $\mu$ M) (C).  $n = 10$  cells per condition from one representative experiment (of three) in (B, C). ns (not significant) as determined by two-way ANOVA with Tukey's multiple comparison test in (B, C).

**Table S1:** List of plasmids used in this study. Table listing the source of each plasmid with the cloning sites and the primers for mutagenesis, if applicable.

| Plasmid                                | Cloning sites | Remarks                                                                                                                            | Primers for mutagenesis (5' to 3') : sense | Primers for mutagenesis (5' to 3') : anti-sense |
|----------------------------------------|---------------|------------------------------------------------------------------------------------------------------------------------------------|--------------------------------------------|-------------------------------------------------|
| pcDNA 3.1                              |               | Purchased from Thermo Fisher Scientific.                                                                                           |                                            |                                                 |
| pCMV Aquamarine C1                     |               | Kind gift from F. Merola, Université Paris-Saclay, France                                                                          |                                            |                                                 |
| pCMV Aquamarine-tdLanYFP tandem        |               | Kind gift from F. Merola, Université Paris-Saclay, France                                                                          |                                            |                                                 |
| pcDNA 3.1 mCherry-hLC3B                |               | Addgene plasmid #40827.                                                                                                            |                                            |                                                 |
| pCMV Aquamarine-proLC3B                | BglIII/EcoRI  | pCMV Aquamarine C1 was used as a backbone vector. Insert proLC3B was subcloned from pcDNA 3.1 mCherry-hLC3B.                       |                                            |                                                 |
| pCMV Aquamarine-proLC3B-tdLanYFP       | BglIII/EcoRI  | pCMV Aquamarine-tdLanYFP tandem was used as a backbone vector. proLC3B was inserted by subcloning it from pcDNA 3.1 mCherry-hLC3B. |                                            |                                                 |
| pCMV Aquamarine-proLC3B G120A          |               | Obtained from pCMV Aquamarine-proLC3B                                                                                              | cactgacaatttcacgcgaaacgtctcctcctggga       | tcccaggagacgttcgcgagtgaaattgtcagtg              |
| pCMV Aquamarine-proLC3B G120A-tdLanYFP |               | Obtained from pCMV Aquamarine-proLC3B-tdLanYFP                                                                                     | cactgacaatttcacgcgaaacgtctcctcctggga       | tcccaggagacgttcgcgagtgaaattgtcagtg              |
| pGEX GST-ATG4B                         |               | Kind gift from R. Ketteler, LMCB, UCL, United Kingdom.                                                                             |                                            |                                                 |
| pCMV WT ATG4B                          | NheI/EcoRI    | pcDNA 3.1 was used as a backbone vector. Insert WT ATG4B was subcloned from pGEX GST-ATG4B.                                        |                                            |                                                 |
| pCMV ATG4B C74S                        |               | Obtained from pCMV WT ATG4B                                                                                                        | cgcagcatgctgccccagcctg                     | caggctggggcagcagctgcctcggg                      |
| pCMV ATG4B W142A                       |               | Obtained from pCMV WT ATG4B                                                                                                        | gfgtggcccgctacgcctggccctatggactt           | aagtcacataggccaggcgtaccgggcccacac               |
